# Supplementary material
Source: PubMed Central journal article supplement (PMC7733789)
Supplement: pnas.2020158117.sapp.pdf [file pnas.2020158117.sapp.pdf]

Supplementary Information for

## Condensing Water Vapor to Droplets Generates Hydrogen Peroxide

Jae Kyoo Lee<sup>1†</sup>, Hyun Soo Han<sup>2,3†</sup>, Settasit Chaikasetsin<sup>2</sup>, Daniel P. Marron<sup>1</sup>, Robert M. Waymouth<sup>1</sup>, Fritz B. Prinz<sup>2,3\*</sup>, Richard N. Zare<sup>1\*</sup>

<sup>1</sup>Department of Chemistry, Stanford University, Stanford, CA 94305, USA.

<sup>2</sup>Department of Mechanical Engineering, Stanford University, Stanford, CA 94305, USA.

<sup>3</sup>Department of Materials Science and Engineering, Stanford University, Stanford, CA 94305, USA.

†These authors contributed equally to this work.

\*To whom correspondence may be addressed:

Prof. Richard N. Zare

Email: [zare@stanford.edu](mailto:zare@stanford.edu)

Prof. Fritz B. Prinz

Email: [fprinz@stanford.edu](mailto:fprinz@stanford.edu)

### This PDF file includes:

Figures S1 to S6  
Legend for Movie S1

### Other supplementary materials for this manuscript include the following:

Movie S1

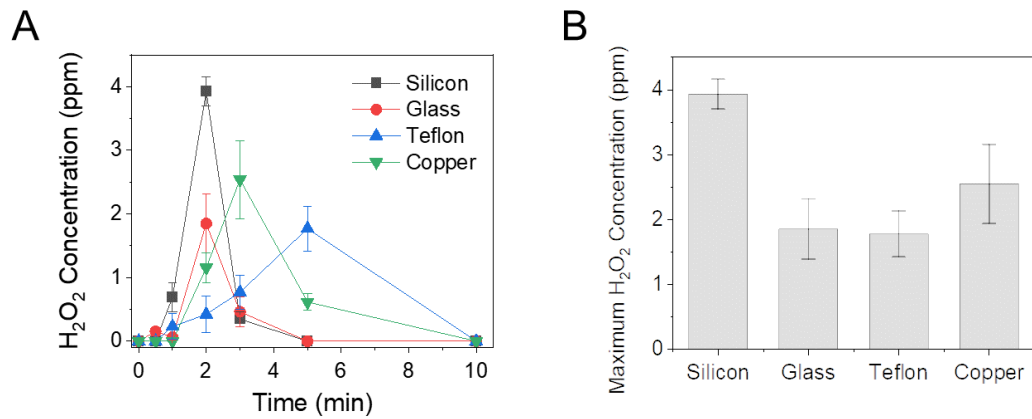

**Fig. S1.** The dependence of H<sub>2</sub>O<sub>2</sub> production yield on types of materials. (A) Time course of H<sub>2</sub>O<sub>2</sub> concentration in water microdroplets collected from silicon (Si) wafers, slide glasses, Teflon sheets, and polished copper. (B) Maximum H<sub>2</sub>O<sub>2</sub> concentration for each surface material. Error bars represent one standard deviation from three independent measurements.

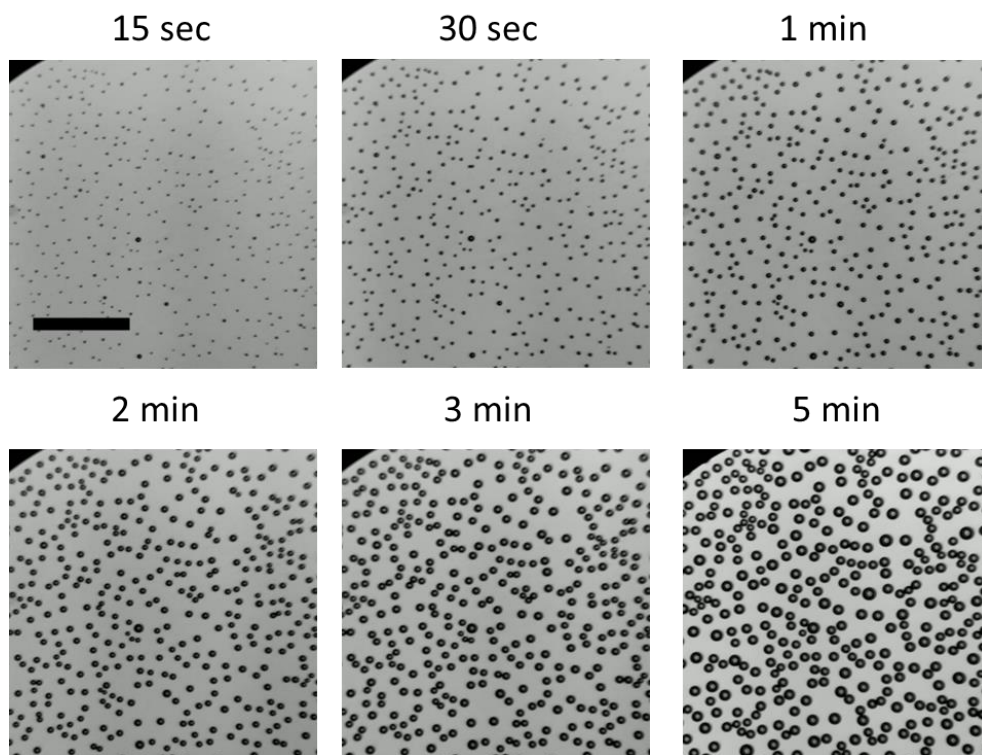

**Fig. S2.** Time-lapse brightfield images of water condensation on hydrophobic-treated Si surfaces. Scale bar, 50  $\mu\text{m}$ .

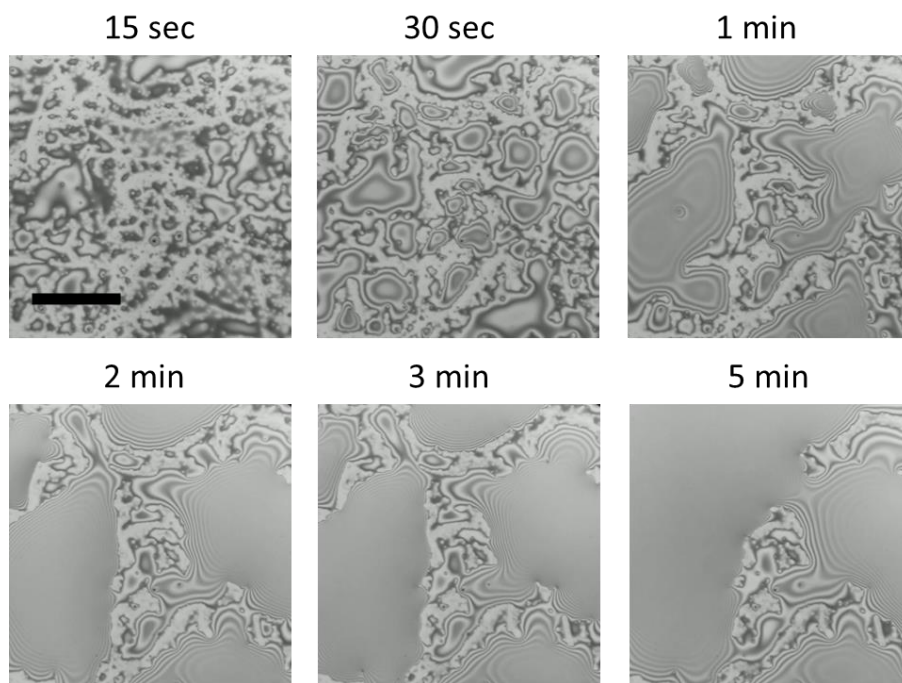

**Fig. S3.** Time-lapse brightfield images of water condensation on hydrophilic-treated Si surfaces. Scale bar, 50  $\mu\text{m}$ .

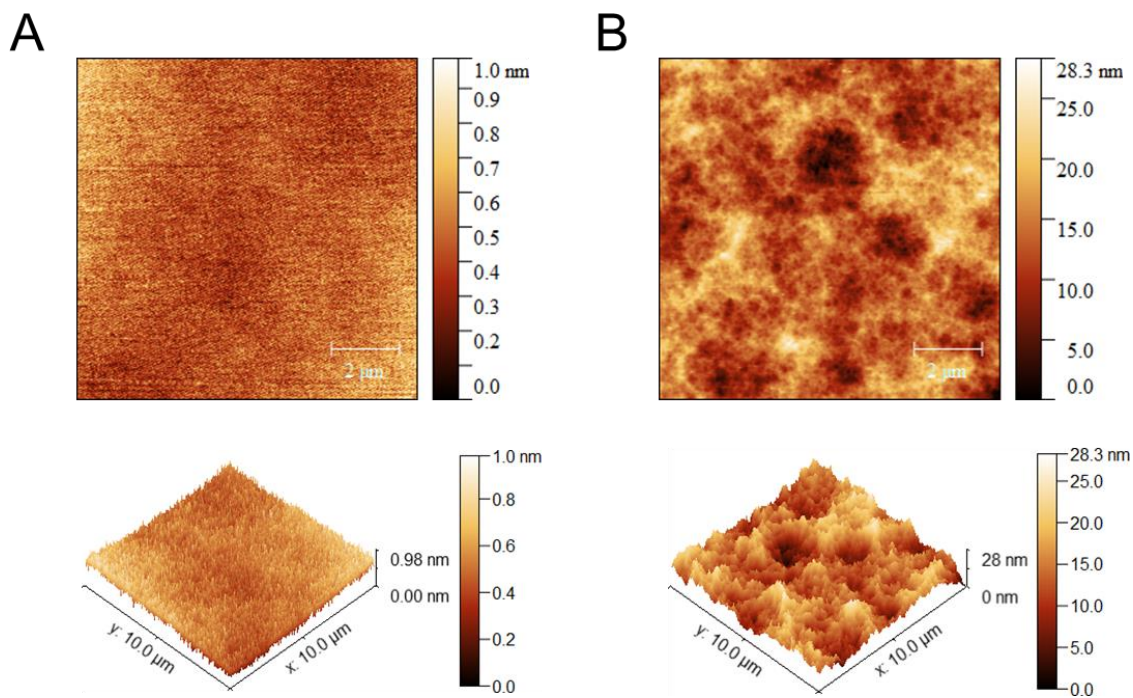

**Fig. S4.** AFM images of (A) an untreated silicon surface and (B) a deep reactive-ion etched Si surface. Root mean square (RMS) surface roughness was 0.12 nm for (A) and 3.80 nm for (B). Scale bar, 2 μm.

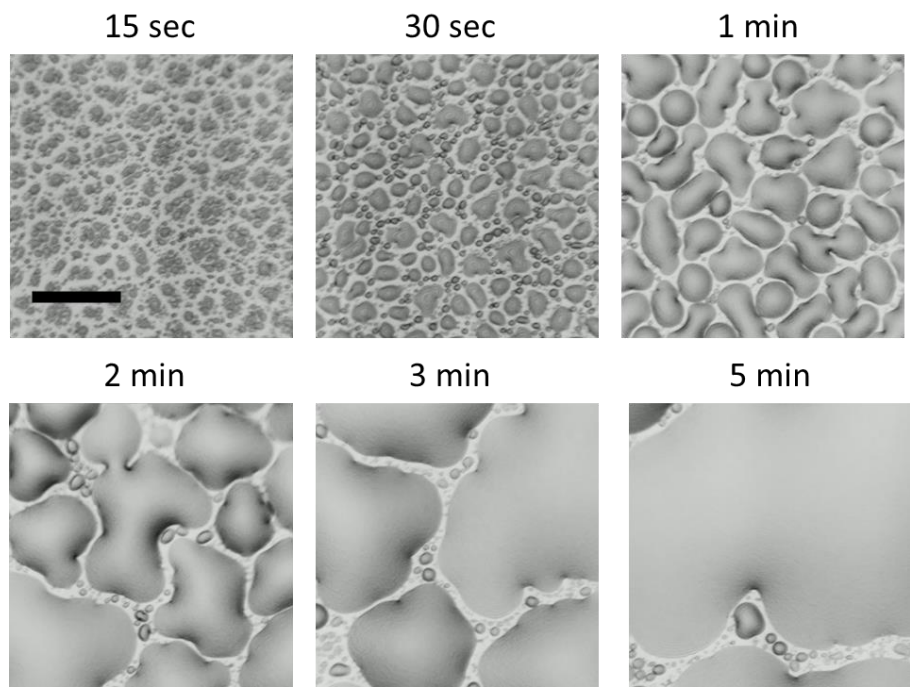

**Fig. S5.** Time-lapse brightfield images of water condensation on a deep reactive-ion etched Si surface. Scale bar, 50  $\mu\text{m}$ .

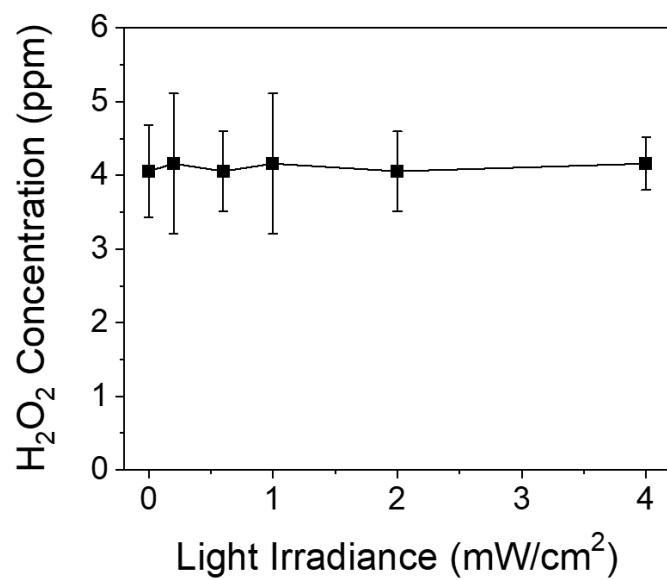

**Fig. S6.** The effect of the irradiance of visible light ( 400 – 700 nm) on the production of H<sub>2</sub>O<sub>2</sub> from condensed water microdroplets on untreated Si wafers. The surface temperature and the relative humidity were fixed at 3.5 °C and 50%. The typical irradiance by fluorescent room lights used in experiments was approximately 0.2 mW/cm<sup>2</sup> over this wavelength range.

**Movie S1 (separate file).**

A video showing the spontaneous generation of hydrogen peroxide in microdroplets condensed from water vapor on a silicon wafer mounted on a Peltier cooler. The wafer surface temperature and the relative humidity were maintained at 3.5 °C and 55%. The color change of the test strip from white to blue indicates the production of hydrogen peroxide.
